# Supplementary material for: Molecular drug design, synthesis and structure elucidation of a new specific target peptide based metallo drug for cancer chemotherapy as topoisomerase I inhibitor
Source: Royal Society of Chemistry journal article supplement (doi:10.1039/c2dt12044e), 2012-01-01
Supplement: c2dt12044e.pdf [file c2dt12044e.pdf]

## Supplementary data

### Molecular drug design, synthesis and structure elucidation of new specific target peptide based metallo drug for cancer chemotherapy as topoisomerase I inhibitor†

Sartaj Tabassum<sup>a\*</sup>, Waddhaah M. Al-Asbahy<sup>a</sup>, Mohd. Afzal<sup>a</sup>, Farukh Arjmand<sup>a</sup>, Vivek Bagchi<sup>b</sup>

<sup>a</sup>Department of Chemistry, Aligarh Muslim University, Aligarh, UP-202202, India.

<sup>b</sup> Department of Chemistry, University of Missouri, Rolla, MO – 65409, USA.

\*Author to whom correspondence should be addressed: e-mail: [tsartaj62@yahoo.com](mailto:tsartaj62@yahoo.com)

#### Figures

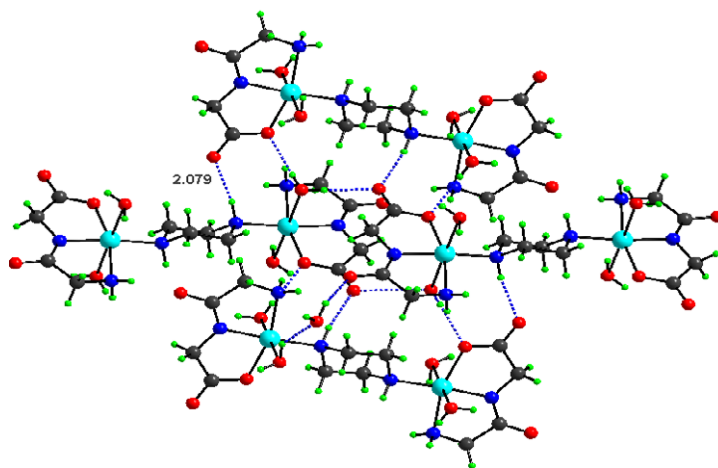

**Fig. S1.** The Packing diagram of [Cu(glygly)<sub>2</sub>(ppz)(H<sub>2</sub>O)<sub>4</sub>].2H<sub>2</sub>O, showing O–H interactions.

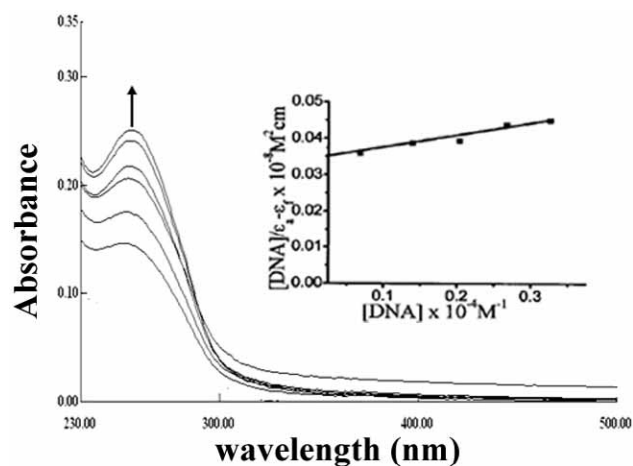

**Fig. S2.** Absorption spectral traces of complex **1** in 5mM Tris HCl/ 50 mM NaCl buffer at pH 7.2 upon addition of CT DNA. Inset: Plots of  $[\text{DNA}]/\epsilon_a - \epsilon_f$  ( $\text{m}^2 \text{cm}$ ) vs  $[\text{DNA}]$  for the titration of CT DNA with complexes  $\blacksquare$ , experimental data points; full lines, linear fitting of the data.  $[\text{Complex } \mathbf{1}] 0.67 \times 10^{-4} \text{ M}$ ,  $[\text{DNA}] 0.067\text{--}0.33 \times 10^{-4} \text{ M}$ .

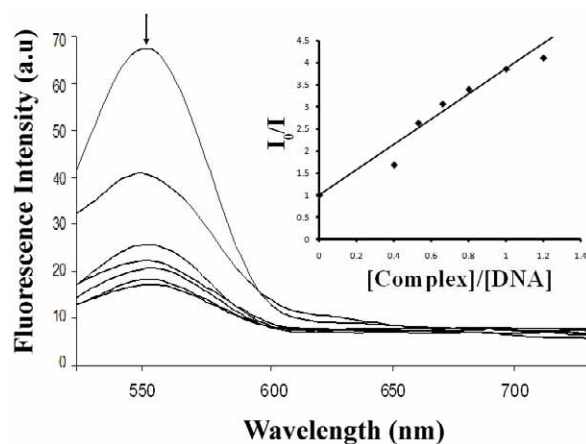

**Fig. S3.** Emission spectra of EB bound to DNA in the absence and presence complex **1** in 5 mM Tris-HCl/50 mM NaCl buffer. Arrows show the intensity changes upon increasing concentration of the complex **1**. Inset: Plots of  $I_0/I$  vs  $[\text{complex } \mathbf{1}]/[\text{DNA}]$ . ( $\blacksquare$ ) experimental data points; full lines, linear fitting of the data.

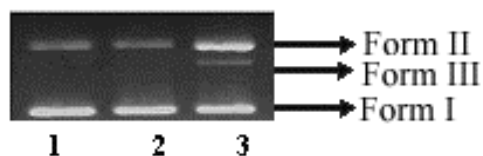

**Fig. S4.** Agarose Gel electrophoresis pattern for the cleavage of pBR322 supercoiled DNA (300 ng) by complex **1** in presence of DNA minor binding agent DAPI and major binding agent methyl green at 310 K after incubation for 45 min. Lane 1, DNA control; Lane 2, 25  $\mu$ M of **1** + DNA + DAPI (8  $\mu$ M); Lane 3, 25  $\mu$ M of **1** + DNA+ methyl green (2.5  $\mu$ L of a 0.01mg/ml solution).

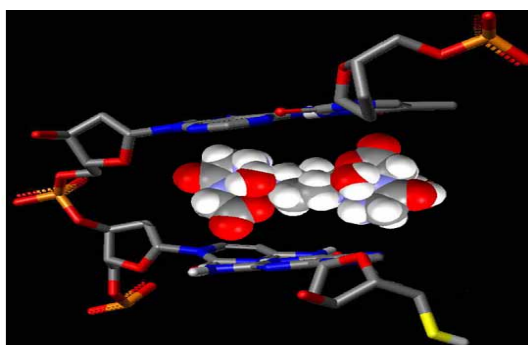

**Fig. S5.** View is a cut-out of sequence 5'-AAAAAGACTTsX-GAAAATTTTT-3' showing complex **1** (space filling model) docked in DNA sequence between C112, A113 and T10, TGP11.

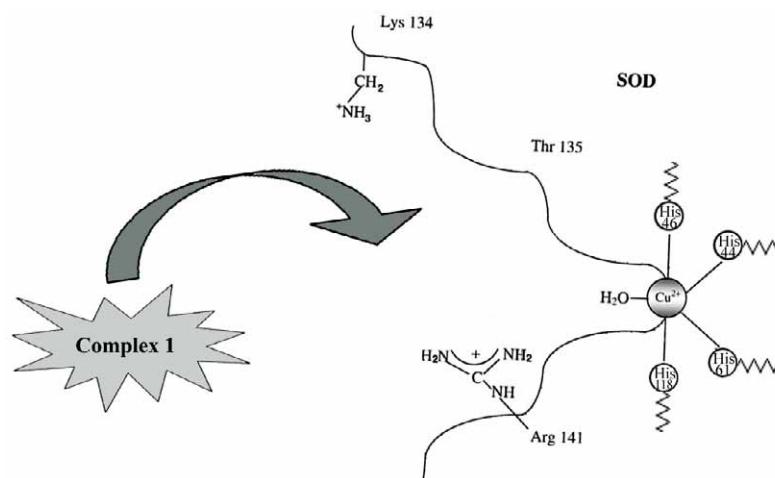

**Fig. S6.** Schematic representation of the key–lock interaction between the CuZnSOD enzyme (PDB ID: 1SXA) and the complex **1**.

**Tables:**

Table S1 : Selected bond lengths (Å) and angles (°) for complex **1**

| Bond lengths        | (Å)        |
|---------------------|------------|
| Cu(1) – N(1)        | 1.897(3)   |
| Cu(1) – N(3)        | 1.993(3)   |
| Cu(1) – O(1)        | 2.017(3)   |
| Cu(1) – N(2)        | 2.063(3)   |
| Cu(1) – O(4)        | 2.381(4)   |
| Bond Angles         | (°)        |
| N(1) – Cu(1) – N(3) | 173.20(15) |
| N(1) – Cu(1) – O(1) | 82.38(13)  |
| N(3) – Cu(1) – O(1) | 98.77(13)  |
| N(3) – Cu(1) – N(2) | 82.44(15)  |
| N(3) – Cu(1) – N(2) | 95.56(15)  |
| O(1) – Cu(1) – N(2) | 163.48(13) |
| N(1) – Cu(1) – O(4) | 92.83(14)  |
| N(3) – Cu(1) – O(4) | 93.89(14)  |
| O(1) – Cu(1) – O(4) | 89.36(15)  |
| N(2) – Cu(1) – O(4) | 97.85(17)  |

Table S2: IC<sub>50</sub> (μM) values of the complex **1**, some of the dipeptide-based SOD-mimicking compounds and the native Cu,ZnSOD enzyme.

| Complexes                                                                                                     | IC <sub>50</sub> (μM) |
|---------------------------------------------------------------------------------------------------------------|-----------------------|
| [Cu <sub>2</sub> (glygly) <sub>2</sub> (ppz)(H <sub>2</sub> O) <sub>4</sub> ]. 2H <sub>2</sub> O ( <b>1</b> ) | 0.086 (This work)     |
| [Cu(ala-ile)]                                                                                                 | 330                   |
| [Cu(ala-thr)]                                                                                                 | 0.99                  |
| [Cu(ala-tyr)]                                                                                                 | 252                   |
| [Cu(ala-val)]                                                                                                 | 237                   |
| [Cu(ala-Phen)]                                                                                                | 0.149                 |
| Native Cu,Zn-SOD                                                                                              | 0.045                 |
